# Supplementary material for: Bioprocess Engineering, Transcriptome, and Intermediate Metabolite Analysis of L-Serine High-Yielding Escherichia coli W3110
Source: MDPI journal article supplement (doi:10.3390/microorganisms10101927), 2022-09-28
Supplement: s1 [file s1]

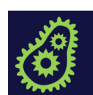

## Article

# Bioprocess Engineering, Transcriptome, and Intermediate Metabolite Analysis of L-Serine High-Yielding *Escherichia coli* W3110

Chenyang Wang <sup>1,2,†</sup>, Qinyu Li <sup>1,2,3,†</sup>, Peng Zhou <sup>4</sup>, Xiaojia Chen <sup>1,2,3</sup>, Jiping Shi <sup>1,2,3</sup>, and Zhijun Zhao <sup>1,2,\*</sup><sup>1</sup> Biorefinery Laboratory, Shanghai Advanced Research Institute, Chinese Academy of Sciences, 99 Haik Road, Shanghai 201210, China<sup>2</sup> College of Life Sciences, University of Chinese Academy of Sciences, 19 Yuquan Road, Beijing 100049, China<sup>3</sup> School of Life Science and Technology, ShanghaiTech University, 393 Middle Huaxia Road, Shanghai 201210, China<sup>4</sup> School of Health Science and Engineering, University of Shanghai for Science and Technology, Shanghai 200093, China

\* Correspondence: shijp@sari.ac.cn (J.S.); zhaozj@sari.ac.cn (Z.Z.); Tel.: +86-138-1763-8015 (J.S.); +86-180-1628-6015 (Z.Z.)

† These authors contributed equally to this work.

## Supplementary Materials

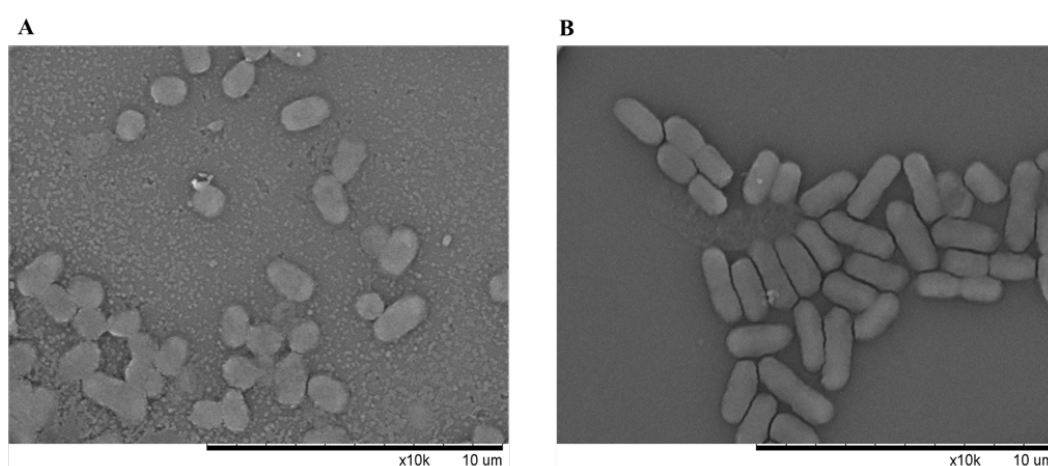

**Figure S1.** Microscopic observation of (A) SSW-01 and (B) SSW-02. SSW-01 cells were shorter than SSW-02 cells.

**Table S1.** Gene knockout primers used in the experiment.

| Primer         | Sequence(5'-3')               |
|----------------|-------------------------------|
| K1             | CAGTCATAGCCGAATAGCCT          |
| K2             | CGGTGCCCTGAATGAAGTGC          |
| <i>sdaA_v1</i> | CAGGCATTACATCTGGGTCGTTATCACC  |
| <i>sdaA_v2</i> | GGTGCAGGAAGTTCAGCCAGAATGTC    |
| <i>glyA_v1</i> | GGGTTATGAGTAAACATACGG         |
| <i>glyA_v2</i> | CCGGTTAGTACTCAACTTGATCC       |
| <i>sdaB_v1</i> | GATGGTGCTGACCGTAATGTTCTTCGTC  |
| <i>sdaB_v2</i> | CTCCAGACTCTGAAACTCGACCAGCAG   |
| <i>ilvA_v1</i> | GTTGTCGCCGGAGATGTGGTAGTAATTC  |
| <i>ilvA_v2</i> | GTTTTCGATGCTGGAGAATCTGGCAGTAG |
| <i>tdcB_v1</i> | GATCAGCGACAAAGAAATCAGCACCAG   |

|                |                                |
|----------------|--------------------------------|
| <i>tdcB_v2</i> | GCAGGTTTCTATGTATGAAGCGCAACTG   |
| <i>tdcG_v1</i> | GAGATCGCCACCAGAATGCAAATCAGTAC  |
| <i>tdcG_v2</i> | GGATCTCGTACACCTTCTCAATCGTTCCTG |
| <i>sdaC-v1</i> | GAAGTCGGTATTCGCGCCATTGAAGAG    |
| <i>sdaC-v2</i> | GATCGGCTGCTGAACTGTACGGATAAG    |

Gene-v1/K1 and gene-v2/K2 were used for colony PCR verification.

**Table S2.** Primers used for *glyA* mutation used in the experiment.

| Primer                                                            | Sequence(5'-3')                        |
|-------------------------------------------------------------------|----------------------------------------|
| 8-F                                                               | GAACATGGCCGATTATGATGCCGAAGTGTGGC       |
| 30-F                                                              | AAGAGCACTTCGAACTGATCGCCTCCGAAAAC       |
| 49-F                                                              | GGTACTCAGCTGACCAACAAATATGCTGAAGG       |
| 50-F                                                              | GGTTCTCTGCTGACCAACAAATATGCTGAAGG       |
| 101-F                                                             | CTCCCAGTCTAACTTTGCGGTCTACACCGCGCTG     |
| 161-F                                                             | TGCCAAAGAACAACAAGCCGAAAATGATTATCG      |
| 178-F                                                             | TTCTCTGCATATCCCGGCGTGGTGGACTGGGC       |
| 191-F                                                             | AAATCGCTGCCAGCATCGGTGCTTACCTGTTC       |
| 229-F                                                             | TACTACCACCACTCACGGAACCCTGGC            |
| 248-F                                                             | CGAAGAGCGGTACAAAAAACTGAACTCTGCCGT      |
| 301-F                                                             | TGGTAGAAGGGTTCCTCGAGCGCGGTACAAA        |
| 358-F                                                             | TTTGCGACCTCCGGTATTCGTGTAGGTACTCC       |
| 388-F                                                             | ATGTGTGTCGTGCTGGACAGCATCAATGATGA       |
| 399-F                                                             | TGAAGCCGTTTTTCGAGCGCATCAAAGGTAAAG      |
| 409-F                                                             | AAGTTCTCGACCTCTGCGCACGTTACCCGTT        |
| 413-F                                                             | TTCCCCGGTTTACGCATAAAAGCTTATCATCG       |
| 8-R                                                               | CATAATCGGCCATGTTCAATTCACGCTTTAACATCA   |
| 30-R                                                              | CAGTTCGAAGTGCTCTTCCTGACGTACTTTTTCC     |
| 49-R                                                              | TTGGTCAGCTGAGTACCCTGCGCCTGCATTACG      |
| 50-R                                                              | TTGGTCAGCAGAGAACCCTGCGCCTGCATTAC       |
| 101-R                                                             | CCGCAAAGTTAGACTGGGAGCCGGAGTGCG         |
| 161-R                                                             | GCTTGTGTTCTTTGGCATGTTTTTCCAGATCGGCGTAG |
| 178-R                                                             | CCGGGATATGCAGAGAAACCACCGATAATCAT       |
| 191-R                                                             | GATGCTGGCAGCGATTTACGCATTTTCGCCC        |
| 229-R                                                             | ACCCGCCAGGGTCCCGTGAGTGCTG              |
| 248-R                                                             | TTTTGTACCGCTCTTCGCTACCACCTTTCGCC       |
| 301-R                                                             | GAGGAACCCTTCTACCATCGCTTTAGCGTTTT       |
| 358-R                                                             | ATACCGGAGGTCGCAAACGGGCTCTTCGGATC       |
| 388-R                                                             | TCCAGCACGACACACATCCAGCCAGCCAGTTC       |
| 399-R                                                             | GCTCGAAAACGGCTTCATCATTGATGCTGTCC       |
| 409-R                                                             | GCAGAGGTCGAGAACTTTACCTTTGATGCGCT       |
| 413-R                                                             | ATGCGTAAACCGGGGAACGTGCGCAGATGTCGAG     |
| Ep-PCR primers used in Mutant Library Construction of <i>glyA</i> |                                        |
| <i>glyA</i> -ep-F                                                 | GGAATTCCAT ATGTTAAAGCGTGAAATGAAC       |
| <i>glyA</i> -ep-R                                                 | CCCAAGCTT TTATGCGTAAACCGGGTAAC         |
